# Supplementary material for: Hagfish genome reveals parallel evolution of 7SL RNA-derived SINEs
Source: PubMed Central journal article supplement (PMC7245038; doi:10.1186/s13100-020-00210-2), 2020-05-22
Supplement: 13100_2020_210_MOESM2_ESM.pdf [file 13100_2020_210_MOESM2_ESM.pdf]

tgatcccctcaactacagacctatcagccttctccccatcatcagcaaagtaatggagtcctatcttgacg  
gtctcttcttaactcgtaactctctgacaaccagttggcttccgacctggccattccaccttggatg  
gttaactctctgacacagcagtgatggatgacctgaaccacaagaggttagggccatctctctg  
gatactctctcgagccttggacactgtctggcatccagccttgatttctaagttgtcttcaatttgg  
aggcccccctgctcaagtggtgtctgatttttctctctatgagcagaaacagcaggtggcccttgatg  
tgtcttcccatgatcttccctcagcctgggttccacaaggcagcatttaggacctacattatctc  
ttgatctatatacaatgatctgtctgattctcttgaaaaccaactttaccattttgccgatgactccacc  
tgtgcagaacgatatacacttgtgaaaggctggccgctgctgaatcccttttgtcagacctggacaa  
gataagccgctggtcagctacttgaacatgatgttcaatggggcaagtcacacgctctcacactgtctc  
tccacaaggatcggaatcaactatccaatccactctctggacagccactggaagaggtgcagtcctc  
ggaactccttggcctcactatctgccataaccttccatgggaggatcatabcaccagctagcatcaaa  
ggcagtcgcccgtctgggtattctccgtagagctaaaggcattcctgagccgaccagctcatcacgggt  
acaaggcttccatataggagctccatggagtatggctccccactctgggctgggtgctcctgcttccc  
tgctcctcttgaggcagtcacaaaacaggccttccgcaccattggatctcaagacagggagggattccc  
aaggatgtcactctcccacgggtggcaagtgggtggctctctattttatacaagcttacatctggcct  
tgctcctcctgcccctcagctctgccctcccacagccaccaggtcacacgcttctcctcaagaaac  
cctcactgctcacctcccacaggtccaggtgggtgcccactgcatctcctgctccccttattctccc  
aattgtggaatcgtctccctgtgtccgttctctcactcctcctcactcagctcttcaaatgcgctgccc  
tcaactacctcagccccatgctctctacacacgctgattcttcccattctgttctctctgggcccatt  
gttactcgtttttgtgttctcctccttctctctgtgtatgtccacccccccataacctttggtagt  
ttgtgaacctgctgccccttctgctatttagctcctccatgagcctagacccttgataaaaaaaaaa

>RTE-11\_EBU

ttttaagcagagataggataaaattttgaagggaacagtaagttgtatgtgggtttgtggatctggaga  
aagcatalgataaggttccwagggagggtggtgattgggtgctgagaagaatgagggctgaaagactgtaa  
gggtagttgaggtgatgatgaaggggctaaagacatcagtcagaacaggaatgggtgctcagaggcattt  
gagataaaggtaggtttacatcaagggctcagctcttagtccttttgggtttgtgggtggatggatggt  
tgagtgagggagcaagaagaggggtaccttgggaaatggtggttgcagatgatttgggtgggtgctcaga  
ctctgaggagggacttcaggatgcaatggttgcattggcaggaagtttggaaagtggggataagttggtg  
gaaacagaggtaatggtgagcaagagagaggggaagagaggatgtggatattgggatagggcagggcaggg  
gttaaagcaggtgggaaaattcaagtacctgggttcttccaggggggtgggggtggtgggggttgaggcagg  
gtggagtaagtgaggaggtgttctgggggtggctatgatcaaaagattcgggttaggctgagggcaagat  
ttacaaaatggtaataagaccagttctcctgtagggagcagagggcctggccttgagaaaaggaagagaga  
gattgctgcagaggatggagatgctggatgctgagagggctgaggggatctctctgagggaaaggaagag  
agtgggcagggatgaaggacattagcgaagaggcagagaggcagctctcgttgggtggggcatgtgct  
caggagggaggaggaatgtggtcaggcaggtcttggatggatgagtcagttggcagggaggaaggggca  
gcccaaaatggaggtgaaagaggtggtggagagggacatgagagaggtgggggtgagagagagagatgc  
tcgggatagaggggtggtggagagggaaaactcatcgggccgacccccacaagaaggtgggatataatgggg  
ccatgaagtagtagtagtagtagtagtagtagtagtagtagtagtagtagtagtagtagtagtagtagta

>RTE-2\_EBU

aaccaccgcaactgtggttgcacaagttagtgactctcagcgcgggtcccagccggataaatggggag  
ggttgctcaggaagggcatccggcgtaaaacctgtgccaaatcaatagcggatcataaaacggatttc  
cataccggatcggtcgagggccgggttaccacagaccgccaccggactggtggccagcagggatccgggt  
gaaaactgtgctactgctgggcaaggagagagaagggaggggggaagggcgtgctccagaggcagtgaggaga  
ggaggaagggtagaaggttggaggtgagagttggaacttgaatgttgtaactgactgagcagaaagggcg  
agagttggctgataatgatggagagggagaaggtggacatactgtgtgtaacagagaccaagtgatgggg  
tgtaaagctaggagcatcgaggtgggttcaaacctgttctaccatgggtggtgagggagagaaatgggtg  
tnggggtaactcctgaaggaggtatgttaagagggatattggaggtgaggagaggtgctgaccaggtgat  
gagtgtaagttggaatgtgaagggtgagtgatgaaatgtcatcagtgcatatgcccgcaggtgggggtg  
gagatggaggagaagaagatttctggagtgagtagatgaagtggtggagaggtgataccaaggaagaaa  
gagtggtgattggaagcggatttcaatgggcatgtggggaaaggaatagagatgatgaggaggtgatggg  
taggtacgggtgcaacagaggaatgtggaagggcagatgggtgggtgattttgcaaaaagaaatggaaatg  
gcggtgtaaaatcgtattttaaagaaggaagggacacaggggtgactgcaagagtgaggaaggtgacac  
aggtggactactgcttaagcagggatgcaacctgaaagagattagagactgtaaggtgggtggcagggga  
gagtgtagctagacagcatcggatgggtggtttgtaggatgattttgggtggtgaggttgaggaagagagtg  
agggctgaaccaaggaccagatgggtggaagctgaaggaggaagactgtgctgtaaaatcagggagggag  
tgagcaggttggatggatgggtgaaagaggtggtggcagcactgggcaactctcagaagttggtgagggga  
gatagctaggaaggtacttgggtgacatctggacagaggaaggaagacaaggagacttgggtgggtggaac  
gaggaagtacaggaaggtataaggaagaagaggttggcgaaaaagaaatgggatagccagagagatgaag  
aaagtagacagaggtacaagaggtggcggcgaagggcgaagagagaggtggcgaaggtcaaggaaaagggc  
atatggcagctgtatgagaagttggatacaaaaggaaggggaaaagatttggatccgatggccagacag  
agggaccgagctgggaaggtatgctgcaggttaggggtgataaaagcagcagatgggaaatgctgctgacaa  
gagagagaggtggttgagaaggtggatggagtagctttgaggagctgatgaaatgaagaaaatgagagaga  
gagaaggttggaaaggtggagatagtgaaatcaggaagtcgggtggattagtaaggtgaaatgagggact  
gctatgaaagagatgaaagaggtgaaaggggttggccagatgataaccagtgagggatggaaggtggt  
taggagagatggcaggtgggtttttaaaccagattgtttaaataaaatcctggaaagtgagaggtgckga  
ggagtgagatgaaaggtactggtagcagatttttaagaataaggggtgagtgacagagctgtggtaattac  
agagggataaaagttgttaagccacacctgaagttgtgggaaagagtagtggaagctaggttgagagggag  
aggtgatgattgtgagcagcaataatgggtttatgocaggaagagcaccacagatgcatggttcttctt  
gagaatgttgatggagaagttatgggaagggccagaaggttgcattgtgtgttttggatgatttaga  
gcttatgacaggggtgcaagagagaggttgggtatgtatgaggaagtcgggagtggttagagaagtatg  
tgaggggtggtgacagatagtaggacaggtgacacgggtgaggtgctgggtaggaatgacggaccg  
gtttaaggtagaggtgggatgcaaccaaggtcggctctgagcccttctcctgttggcaatgggtgatggac  
aggttgacggacagatcagacagaggtctccatggactatgatgttccgggatgacatgctgatctgta  
gtgagagtagggagcaggtgagggcagcctcgagaggtggaggtacgcactggagagaaggggaatgat  
agtcagtgaggtgagacaggtgacatgtgcgtaaatgagagggaggggtgggtggaatggtgaggtgcaa  
ggagttgaggtggtgaaaggtggatgggtttaaataacttgggatcaactgtccaaagtaacggagaggtg  
gtagagaagtgagaagagaggtgacggcaggtgaggtgggtggagaggttccaggagtgatttgtga

tgaagggtatctgcaagagtgaagggaagatatacaagacggtagtgagaccagctatgttgtatggt  
ttggagggcgtgctgcaaaaaagacaggaagcggagctggaggtggcagagttaaagatgctgcat  
tctcgtttggagtgacaggatggacagatagaaatgagatattagagggacagcaggttaggacg  
gtttggagacaaaagtggagggcagagatggagatggtttggacatgtgcacagggagtgccgggtat  
atcgggagaaggatgctgaggatggagccgccaggtaggaggagaagaggcacaagaggaggttta  
tggatgcggtgagggcggacatcggggtggtggtgtgacaatggaagatgtggaggacagcgaatg  
gagacggatgctcggcgtggtgacccccctaacgggagcagccaaaagaagaaga  
>RTE-4\_EBu

ccggtgtgtgccccggtttagaataggtaaccctatccctgctgtcgtgaaagggcactaaaagggtt  
ggcgtcaggaaggcatccggccataaaacattgctcctcaaaaagggaacatgatgagtaacaattatata  
tgggcagggtacagcccgaagtaccctggtggggctcctcacccctcctgctcaaaaatcaaggtggggaa  
cccgatcgaagcaaggaggaaattactccattcatgacgaccaaatgtctgatgccccacgtggagatc  
ggtttctgaggtttgggacatggaatgtagggacaatgacagggagatcaggagaagtggtggaagtatt  
ggtcagaagaagagtgacatattgtgtgtgacagggagcagatggaagggaagtggtgacagaaatggtg  
aagggttagcaggacagaagtacaagtttgtgtggaagggtgcccggaaggtgtgtatggtgtggtg  
tccgttttctgagggattttagacagatggtgagtggtgagtgactagagtgagtgaaaggttgatggtg  
gagaatggtgatggaaagctcttggatgaaatgtcactcctgggatatgccccgaggtcggcggagcgt  
gaagagaaggacaagttctggtgtgtgatagagaagttgatggaatgtgaaagatgaggaagttggtg  
tggtaggagagacttgaatggacatgtgggaaggagtagagatggttttggaggagtcctgggggtta  
cggatattggtgtgaggaatggaaggatgaaaggatggtggagttgctgtgagagctggtttgtgatt  
tgaataactcaatccagaaggcggataataagcttgttacatacacgctcaggtgggtcgacgacaattg  
ttgactacctgatggtgctgagcagatagggggaaacctccgggacacaaaggtgatcccgggggagga  
ggctgtttcacagcaccattggttgtctgacacataaggatgaaagggtcgagagagagctcggcgggtg  
aagtaccaaccagcaggtgaaaggtggtgaggtgaaaggagtgacagtgaaaggagcactaaagagaggt  
tgagatggttagaggtgatggtgtgagctgaaaggtggtggatgtcaatgaaagatagctgttggg  
agtcgttggtaggtatgtggatggacaaaaggaccacagggcactcggaaacatggtggtgggagatgat  
gaagtggaaagaggttgacgagaagaggaagaagttcaaggagtggaagggcgaagggtagcgggtg  
cagaagagcagcgtatgaaagttataaaggcagccaagaaggctcgaagaaagaggttagcaaaagcga  
ggagccacataggaaaatgctcggagaacgtttggattcggaaaggggtcagagagcgggtatttaggatt  
gcaaaagcagatagcgaagagaggtgcatgtgacgggggtgagttgcttgaaggatgaaaggggacaaa  
tcgttgtggaccagatggaatgaaaggaagatggaagagatataatgaaagggtgtgaaatgtagagaa  
tgaatgggatggcaacatagagagcaaccatcttaggaccgagagagaataactgagaaggaaggt  
gaggaagcgaataagacaaatgaagagtagaaaagcaggagggccagcggagttgtgggagatattgga  
aggcagcgggaagttggggtgtgaaagagaatgacagagatctgtaactcgtggtggtgaaagaagccgcat  
tccagtggtatgggaactgagtaaccctcctcctctgtacaaggggaaaggtgacccctcctggactgtggc  
tccgtatagagcgtaaaagtactggagcagatggaatgaaaggttggaaaggggtgtgggaaagagataa  
ggaagaaggtgaagattgacgaaatgcagtttggatttatgccaggaagaggaacacagatgcatgttt  
tatgtgaagcagtgacagggagaagtagatggagaagaggaagaagttgtttcttgggttgggtgatctg  
gagaaagcattcgatagggttccacgcgaagtagtgacatgggcatgaggaagtaggagtaggaggaat  
ggttgacagagtagtgatggcaatgtacgagagagcgcgacagctgtgaaagcgaaggtgggaaacag  
tggtaggtttgaggtgaaaggtgggagtgcatcaggggtcggtaactaagtcactactattgtagttgtg  
atggaggtgctgctcggagcgaaggaaggggttaccctgggagctggtgtatgcatgatttgggtg  
tgattcggagagtagggatggactgaaaggagaagatgaaatggaaggaatgtatggaggcaaaag  
ggttgatcaagatattgctggcaatgtagcagagcgaaggtgatggaatggtgaaacatggtgaggtggaaagc  
gggaagtgccggtgtgctgtgtgacggaaggggtcggagtgaaactccatcagtgtaaatgtgctg  
agtggttcatcgaaaatgtagtggtgtgagagggctcattaccagtggtgagcagctacattcaagtgtaa  
ggtgtgcatagagggagttgcagatggaggaatgttgagttggatctggagatggcgtgaaagttgga  
ggttgtaaaaacatttggctaccagagacatgctgaaatggagaaggtggatcagactcggcgcaggttg  
ctggagtgagatgtgcatggaagaagtttccggaaactgagtggtgctgacgaggggggaggtgctg  
gaagttgaaagggaaaggtgatgctacatgtgtgagaagtgctatgatttatgggagcagacatgggta  
atgaacgtagagcagcaacgaaggtggaaaggggtggaatgcaaggttgggtggatgtgaggaaat  
cgttgagagagagaggaagacaaaatgatgaaatgctggaagatgagggaaatagagcctgtgaggtggt  
gtgaaagagaacaggttgagatggttgggtcatgtgttgaggaaggtgaaagtgactgggtgagaagag  
tgatggaatgaaatgtagaaggaagtagagggcgggaagaccgagaaagacttggctaaaggtggtgga  
agaagaaatgtgggtaaggggttaacaaggggagatgcagaaaatagggcacaaggtggagaagatgtgca  
tggggcccgaagcctaacccccctctagcagggaaaatggccttaaaaatgctcgttgttgggtg

>SINE1-1\_EBu

accgggctgtagtgccgtgcccctgtaatccggctactcggaggttgggttggagatcgcctgagggacg  
ggagctctgcccgtgggcccgcctatgagaggggttagggcagcccggaaatcatggcgaaccccaatcctt  
atcctgtgtcgtgaaagcagaccaggggtgctcaggaagggcactcggcgtgaaacctgtgccaatc  
agtatgggatcataacggatgatccgctgtggcaccctaacgggagcagccgaaagcgaacaacaa  
ca

>SINE2-1\_EBu

gcctggtgttggcagctggttagggcagcggcttgggatccaagaggtcctgagtttaagccccgttgg  
gccaactgaaataacaccaggggttgactcagcctgtcatccttccgaggtcggcgaatgagtaacca  
gtgtactggccggtgtataccgggttaaaataggtgtaccatcctcctggtcgtgaaagggcagccag  
ggttgcgtcaggaagggcactccggcgtaaaacatgtgccaatcackatcgggatcatacggatgatccg  
ctgtggcgaaccctaacgggagcagccgaagaagaagaaga

>SINE2-1B\_EBu

agcctggtgttggcgtagtggttagggtagcggcttgggatccaaaaggtcctgagttcaagccccgttgg  
gcccgttgaatataacaccaggggttgactcagcctgtcatccttccgaggtcggcgaagtgagta  
ccagtgtagctggcccggtgtatgccccggttagaaataggtgtaccatcctcctggtcgtgaaagggcga  
ccaggggtgctgctcaggaagggcactccggcgtaaaacatgtgccaatcackatcgggatcatacggatgatccg  
atccgctgtggcgaaccctaacgggagcagccgaagaagaagaagaaga

>SINE2-2\_EBu

atgctggtgttggccttaatggttaggggtgggttgggatcctaggatcctgagttcaaatccccgt  
cggctggtgaatataacagggtgggtgactcggcctgtcatccttccgaggtcggcaaaatgagtg

cagcttgctggatcctgtgtcggagtgccgaccgctccaggattgtgcccataagccaaggagactgct  
taggcagcaccacgctctgcacagagataggtcccaatggatggatggatg  
>SINE2-2B\_EBu  
atatgcctgggtgttgcttaaatgggttaggggtggcgggcttgggatcctagggtcctgagttcaaatcccg  
ctcagctgttgaattaacaccaggtggggttaactcagcctgtcatccttccgaggtcggcaaaatgagtg  
gccagcttgctggatatactgtgtcggagtgccgacccgctccaggattgtgcccataagccaaggagactg  
cttaggcagcaccacgctctgcacagagataggtcccaatggatggatggatg  
>SINE2-2C\_EBu  
atgcctgggtgttgcttaaatgggttaggggtggcgggcttaggatccgaggatcctgagttcaaatcccact  
cggctgttgaattaataaccaggtggggtgactctgcctgtcatccttccgaggtcggcaaaatgagtg  
cagcwtgctggatcctgtgtcggagtgccgacccgctccaggattgtgcccataagccaaggagactgct  
tcggcagcaccacgctctgcacagagataggtcccaatggatggatggatg  
>SINE2-3\_EBu  
agcctgggtgttgctcagtggttaggggtggcgggcttgggatcctagggtcctgagttcaagccccgctcg  
ccgctgaattaatacaccagggggtgactcagcctgtcatccttccgaggtcggcaaaatgagtaaccag  
ttccagtggtgtactggtagaggggcaactgcacagcagacagctcgccttcaagaaatgatagctac  
cccggcagctaagctgccatacagaccaccac  
>SINE2-3B\_EBu  
caggcctgggtgttgcttaacgggttaaggtggctggcttaagatcctagggtcctgagttcaagcccttg  
tcgtsctgttgaattaacaccaggttaggggtgactcagcctgtcatccttccgaggtcggcaaaatgagtg  
accagcatgctggtaacgggcaactgcacagcggcagcctgcacccccagaaaaatgatgcagccaagca  
gccacaggctgcatacgaataaataaataa  
>SINE2-3C\_EBu  
aagcctgggtgttgcttagtggttaggggtggcgggcttgggatcctagggtcctgagttttagccctgtt  
ggctgctgaattaacaccaggtggggtgactcagcctgtcatccttctgaggttggcgaatgagtgacc  
agtgtactggtagaggggcaacagcatcagcggcagcggcggcccccaagaaatgatagctaccggcgag  
ccaagctgccatacgaagaagaaga  
>SINE2-4\_EBu  
ttgaacctgggtgttgcttagcgggttaggggtggcgggcttgggatcctagggtcctgagttcaagccccg  
tgctgctgaattaacaccagggggtgactcagcctgtcatccttccgaggtcggcgaatgagtaacca  
gtgtagcagccaaaaggctgcacacgaagggaagggtattgacggatttataaatactgggtattgggtg  
ggcgcagcagcatgtagggcgaatggcctcctcctcgcgcaataatccttgaatacctt  
>SINE2-5\_EBu  
accagactcgggtggcgaatgggttagagcgtccgctctgagctctgggaggtcggcgggtcgaacccccgg  
cgagtcataccaaagacttataaaatggtagctgctccttgccttgacgctcagcatttataaaagga  
tagagcagcggcaaaacacataggttggcaataatagtgacggctttagggcctaataggcctcctcctc  
tgctgcaagttccttgaagggaactcatattattattattattatcatcattattattatt  
>SINE2-5B\_EBu  
cagactcgggtgggtgaatgggttagagcgtccgctctgagctctgggaggtcgggtgttcaaacccccggc  
agtcataccaaagacttataaaatggtagctgctccttgccttgccttgcctcagcaattataaaagata  
gagcatggacaagcacaagttggcaaccatgacacaggtttagggcctaataggcctcctcctcctgctg  
gaagttccttgaagggaactcat  
>SINE2-6\_EBu  
ggctggcagggatggccaagggtagccacactcgcctctaagctgtctagcctgggtttgaaatcccgacc  
cagctataaaactgtcatcctgggtgttccacagggcaggggtgattcaatggtgtgcccgtcctcggat  
ggacgttaaaactggcgctcccgctcgcggcattagttggtggacgttaagatcccacgggtgctcctc  
cgaagagtagggcagctatcgcggcaccatgaacaaatccaaatcctgcccctaaccttagtcgaacg  
tcaggcctggcagccgggttcgtgaaagacttggcgaagcttcccctggccaaccccccaagaaacgtgg  
gaataatgtggcggtaagaagaagaagaaga  
>SINE2-7\_EBu  
tcccctgtggagtcgaatccgactaaaactgcccgtcctgggtgagtgccggcgggtgctgcatcctcggag  
catgcccctcctcagatgggacgttaaagccggctgtcccgtcctgcaatttaggttgggacgttaagat  
cccacggatcctcgtgaaaagagtagggcattgtgtgcccgtaccctggctaaaatcccctgcttagagatt  
aaatgggattgagcagttataaagggtatggatgttaagttagatgaatggttaagaaatgggggt  
agtacatagaagataagtaaatgtagatgaatggttaagttgggtgtggatagcagcagggcatgtaggg  
caaatggcctcctcctgctg  
>SINE2-7B\_EBu  
agctcagttggtagcgtgctcgcattgagctgtctagctcgggtttgatccccgacggggtcggactta  
acaaaactgcccgttctggtgagtgccagcagggggcgtgcatcctcagcagcgcctcctcggatggg  
gatgtaaaagccggctgtcccactcgtcatttaggttgggacgttaagatcccacggatccttcaaaaa  
gaggccattgtgtcccgtaccctggccaaatccctgcttggggttagctgataaattagcactacctg  
cagagtaggtgggagtgctggggttggatattggcagggcatgtagggcctcctcctcctgctg  
ctaagtttccctgca  
>SINE2-9\_EBu  
agcctgggtgtggctcagtggttaaggcgggtggccttgggatccttggggtcctgagttcagacccccgctg  
ctgctgagttagcatcaggggggtgactcagcctgtcatccttccgaaggtcgggtgaaatgagcaccag  
tatactggttaattatccctgcagggctcgaaggcactaaagggttggcgtcaggaagggcatccggccat  
aaaaacattgccaagaagaagggtaccatgattggagcccgcaaaaagctgacccctgctcagggataaa  
ggctttcaaatggtgtgatgatga  
>SINE2-10\_EBu  
agcctgggtgttgcttagtggttaggggtggccttgggatcctagggtcctgagttttagccccgctt  
tccactgaaatcaaccagggggtgactcagcctgtcatccttccgaggtcgggtgaaatgagtaaccag  
gtactggtcccgtgtatgccccgggttagaaatgggtgtaccatacctcctgtgtgctgtaagaggtgacca  
gggttggcgtcaggaagggcatccggccataaaaaacattgctcaagaaggaacatgattgcatggag  
cccgcaaaaagctaacccctgctcagcagggaaaaatggctgtaaaaaggcttttttattta
